# Supplementary material for: Predicting the potentially exacerbation of severe viral pneumonia by MuLBSTA score joint CD4+ and CD8+ cell counts: construction and verification of risk warning model
Source: Research Square preprint supplement (doi:10.21203/rs.3.rs-3748872/v1), 2024-01-02
Supplement: Supplementary file 2 [file a444ab6cd3d7c456d69b4d2d.docx]

Supplement Figure 1: Study flowchart. RT-PCR: reverse-transcription polymerase chain reaction.


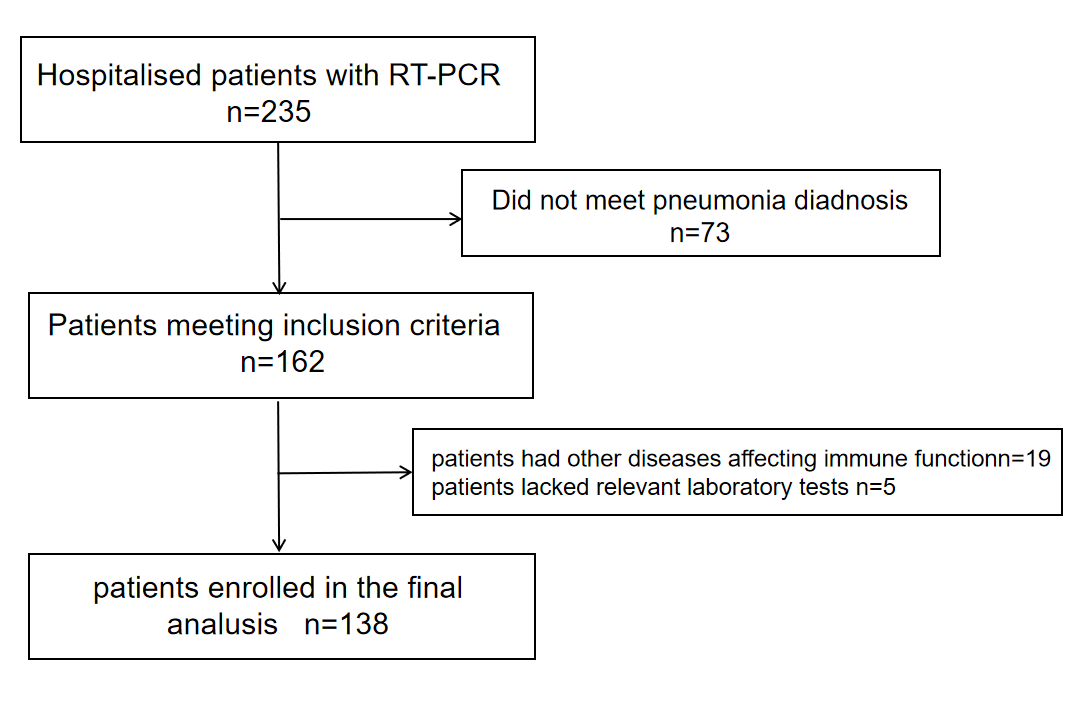


supplement table 1: Viral pneumonia virus species

| virus species of Viral pneumonia | number |
| --- | --- |
| novel coronavirus | 54 |
| human herpes virus | 38 |
| influenza a virus | 8 |
| rhinovirus | 9 |
| human parainfluenza virus | 7 |
| Human adenovirus | 8 |
| influenza virus | 3 |
| enterovirus | 2 |
| respiratory syncytial virus | 2 |
| human metapneumovirus | 2 |
| Bocavirus | 1 |
| cytomegalovirus | 3 |
| Human parvovirus | 1 |

supplemet table2 :Types of bacterial infection

| Types of bacterial infection | number |
| --- | --- |
| Candida albicans | 1 |
| Acinetobacter baumannii | 9 |
| enterococcus faecalis | 3 |
| escherichia coli | 7 |
| Haemophillus influenzae | 3 |
| Klebsiella pneumoniae | 10 |
| mycoplasma | 1 |
| Pneumocystis carinii | 2 |
| aspergillus fumligatus | 2 |
| pseudomonas aeruginosa | 5 |
| streptococcus constellatus | 2 |
| streptococcus pneumoniae | 3 |
| hemolytic streptococcus | 2 |

**Supplement Table3. Coefficient estimates were analyzed by LASSO regression**

|  | Prediction value |
| --- | --- |
| (Intercept) | -0.0876 |
| age | 0.0045 |
| gender | . |
| Co_infection | 0.1087 |
| CD4 | -0.0002 |
| CD8 | . |
| CD4+/CD8+_ratio | -0.0152 |
| lymphocyte | . |
| Multi_loben | 0.1030 |
| smoking | 0.0045 |
| hypertension | 0.0618 |
| ICU_days | 0.0360 |
| hospital_days | 0.0011 |

Supplement table4：Results Table of Logistic multivariate regression coefficients；

| variable | coefficien | [standard deviation](javascript:;) | 95%CI | P |
| --- | --- | --- | --- | --- |
|  | -6.5640 | 3.4930 | -14.99~-0.63 | 0.0060 |
| age | 0.0405 | 0.0446 | -0.04~0.15 | 0.0363 |
| Co-infection(Yes) | 0.5107 | 1.1700 | -1.93~2.88 | 0.0363 |
| CD4 | -0.0012 | 0.0038 | -0.01~0.01 | 0.0074 |
| CD4+/CD8+_ratio | -1.2800 | 1.1890 | -3.98~0.9 | 0.0282 |
| Multi lobe | 1.9370 | 1.1450 | -0.24~4.52 | 0.0091 |
| Smoking(Once) | 1.8390 | 1.5630 | -1.13~5.45 | 0.1239 |
| Smoking | 0.4606 | 1.1950 | -2.07~2.92 | 0.0400 |
| Hypertension | 0.0154 | 1.2520 | -2.73~2.44 | 0.0190 |
| ICU days | 8.2460 | 12.2618 | 2.23~12.61 | 0.194 |
| Hospital days | 0.1355 | 0.0801 | 0~0.33 | 0.0091 |
