# Supplementary material for: Predicting the potentially exacerbation of severe viral pneumonia by MuLBSTA score joint CD4+ and CD8+ cell counts: construction and verification of risk warning model
Source: Research Square preprint supplement (doi:10.21203/rs.3.rs-3748872/v1), 2024-01-02
Supplement: Supplementary file 5 [file d84d18b90faa2c3f8357516d.docx]

Supplement Table3. Coefficient estimates were analyzed by LASSO regression

|  | Prediction value |
| --- | --- |
| (Intercept) | -0.0876 |
| age | 0.0045 |
| gender | . |
| Co_infection | 0.1087 |
| CD4 | -0.0002 |
| CD8 | . |
| CD4+/CD8+_ratio | -0.0152 |
| lymphocyte | . |
| Multi_loben | 0.1030 |
| smoking | 0.0045 |
| hypertension | 0.0618 |
| ICU_days | 0.0360 |
| hospital_days | 0.0011 |
